# Supplementary material for: Genome-Wide Association Study of Cognitive Decline in Schizophrenia
Source: Atypon-hosted journal article supplement (doi:10.1176/appi.ajp.2013.12091228), 2013-06-01
Supplement: 683_ds001.pdf [file 683_ds001.pdf]

## **Supplementary Methods and Data**

### Methods

#### *Subjects*

We selected 197 patients with schizophrenia [57.4% males (113 males and 84 females); mean age  $\pm$  SD, 36.9 $\pm$ 12.2 years old] and 324 healthy controls [42.6% males (138 males and 186 females); mean age  $\pm$  SD, 36.2 $\pm$ 12.4 years old] with assessment of at least one schizophrenia-related phenotype, such as neurocognitive function, neuroimaging, and neurophysiological examinations, from an entire cohort of SP (Schizophrenia Project) in Department of Psychiatry, Osaka University Graduate School of Medicine since 2005 for a genome-wide association analysis (1-3). In this Schizophrenia Project, we recruited patients with schizophrenia and their relatives from the Osaka University Hospital and healthy controls through advertisements at Osaka University. Current whole batteries they received are cognitive tests (WAIS: Wechsler Adult Intelligence Scale, JART: a Japanese version of the National Adult Reading Test, WMS-R: Wechsler Memory Scale-Revised, AVLT: Rey Auditory Verbal Learning Test, WCST: Wisconsin Card Sorting Test, CPT: continuous performance test, facial recognition test, etc.), neuroimaging (three-dimensional brain structural imaging, diffusion tensor imaging, resting state fMRI, etc.), neurophysiological tests (PPI: prepulse inhibition, NIRS: near infra-red spectroscopic topography, EEG: electroencephalogram, etc.), personality traits (TCI: Temperament and Character Inventory and SPQ: Schizotypal Personality

Questionnaire), and blood draw for DNA, RNA, plasma and immortalized lymphocytes. All of the selected subjects (197 patients with schizophrenia and 324 healthy controls) were biologically unrelated. There were no first- or second degree relatives and all were of Japanese descent. Subjects were excluded if they had neurological or medical conditions that could potentially affect the central nervous system, e.g., atypical headache, head trauma with loss of consciousness, chronic lung disease, kidney disease, chronic hepatic disease, thyroid disease, active cancer, cerebrovascular disease, epilepsy, seizures, substance-related disorders or mental retardation. Each patient with schizophrenia had been diagnosed by at least two trained psychiatrists according to the criteria of the *Diagnostic and Statistical Manual of Mental Disorders, Fourth Edition* (DSM-IV), based on the Structured Clinical Interview for DSM-IV (SCID). Current symptoms of schizophrenia were evaluated using the Positive and Negative Syndrome Scale (PANSS). Psychiatrically, medically and neurologically healthy controls were evaluated using the non-patient version of the SCID to exclude individuals who had received current or past psychiatric services or psychiatric medication.

Written informed consent was obtained from all subjects after the procedures had been fully explained. This study was conducted in accordance with the World Medical Association's Declaration of Helsinki and was approved by the Research Ethics Committee at Osaka University.

#### *Genotyping and quality control (QC)*

Genotyping of 197 patients with schizophrenia and 324 healthy controls was performed

using the Affymetrix Genome-Wide Human SNP Array 6.0 (Affymetrix, Santa Clara, CA), according to the manufacturer's protocol. The genotypes were called from the CEL files using Birdseed v2 for the 6.0 chip implemented in the Genotyping Console software (Affymetrix). We then applied the following QC criteria to exclude samples: (1) arrays with low QC ( $<0.4$ ) by Birdseed v2 ( $n = 0$ ), (2) samples for which  $< 95\%$  of genotypes were called ( $n = 0$ ), and (3) samples in the same family by  $\pi$ -hat ( $>0.4$ ,  $n=0$ ). Using the QC criteria, no sample was excluded. Next, we excluded SNPs (single nucleotide polymorphisms) that: (1) had low call rates ( $< 0.95$ ), (2) were duplicated, (3) localized to sex chromosomes, (4) deviated from Hardy-Weinberg Equilibrium (HWE) in the controls  $P < 0.0001$ , or (5) had low minor allele frequencies ( $MAF < 0.05$ ). After all of these exclusions, 541,657 QC'ed SNPs remained for experimental analysis.

To test for the existence of genetic structure in the data, we performed a principal component analysis (PCA) using EIGENSTRAT 3.0. Ten eigenvectors were calculated. Genotype information from the JPT (Japanese in Tokyo, Japan), CHB (Han Chinese in Beijing, China), CEU (Utah residents with ancestry from northern and western Europe), and YRI (Yoruba in Ibadan, Nigeria) in HapMap phase III was compared with our dataset to check for population stratification (Figure S1).

#### *Assessment of cognitive decline*

The premorbid intelligence quotient (IQ) was estimated using the JART (a Japanese version

of the National Adult Reading Test: a reading test consisting of 50 *Kanji* compound words), which was originally developed as an estimated premorbid IQ test for patients with Alzheimer disease (4) and was used for patients with schizophrenia (5-7). The difference score was defined by the subtraction of the estimated premorbid IQ (as measured by the JART) from the present IQ (as measured by the WAIS-R or WAIS-III).

#### *Subjects and statistical method for GWAS*

In this study, we used data from 166 patients with schizophrenia and 323 controls who were completed JART and WAIS with QC'ed genotype and sufficient demographic information. Detailed demographic information is shown in Supplementary Table 1. There was no difference in the mean age between the cases and the controls ( $p>0.3$ ); however, the gender ratio, years of education, estimated premorbid IQ, present IQ, and difference score were significantly different between the two groups. Multiple linear regression analysis was performed to compare the difference score in the major allele homozygous genotypes with that in the minor allele carriers in the patients with schizophrenia, using PLINK 1.07 software. Gender and years of education were used as covariates, because the WAIS and JART scores were already corrected by age. QQ and Manhattan plots are listed in Figures S2 and S3. Multiple linear regression analyses were also used to compare the genotype effects on JART and IQ in the patients with schizophrenia and in the controls.

*Subject and statistical methods for replication study*

Replication study has been performed using a part of the CBDB/NIMH (Clinical Brain Disorders Branch, National Institute of Mental Health) data (8). These data were composed of multiple cognitive batteries with genotyping data by Illumina HumanHap550K/610Quad Bead Chips (San Diego, California) in 339 people with DSM IV schizophrenia. The difference score was calculated by the subtraction of the estimated premorbid IQ (as measured by the Wide range achievement test) from the estimated present IQ (as measured by the WAIS). The association analysis between difference score and three SNPs for replication was performed using PLINK statistical software (v1.07), assuming an additive genetic model and controlling for age, sex, and ancestry (four MDS axes). P values are one tailed, and statistical significance was defined as  $p < 0.05$ .

*Data*

*Analysis for confounding factors*

When the genotype groups in the top 10 SNPs of cognitive decline were compared in the patients with schizophrenia, we found no differences across the demographic variables, except for age and duration of illness (in rs1555702 and rs17069667) and the chlorpromazine equivalent of the daily antipsychotic dose (in rs17005024 and rs11946008) ( $0.01 < \text{all } p < 0.05$ ). To examine whether our findings were influenced by possible confounding variables such as age, gender, education level,

illness duration, and antipsychotic dose, we additionally performed analyses using 5 covariates and 4 covariates models (5 covariates model: age, gender, education level, illness duration, and antipsychotic dose; 4 covariates model: gender, education level, illness duration, and antipsychotic dose). P-values and  $\beta$  for the genotype association by adjusting using 5 or 4 covariates were slightly reduced but remained significant, despite reduced power for these analyses (Supplemental table 3).

#### *Analysis of controls*

In 323 comparison subjects (mean estimated premorbid IQ:  $107.3 \pm 8.1$ , full scale IQ:  $109.0 \pm 12.2$  and difference score:  $1.7 \pm 9.8$ ), no effect of the 10 SNPs was observed on either estimated premorbid IQ or full scale IQ, except for a weak association between rs7157599 and full scale IQ ( $p=0.033$ ). We did not analyze the association between 10 SNPs and difference score (subtraction score of estimated premorbid IQ from present IQ) in comparison subjects, as comparison subjects were not in disease process.

#### *Replication study*

We tried to replicate top 10 SNPs for cognitive decline in patients with schizophrenia using the CBDB/NIMH sample. We could perform replication analysis only three out of ten SNPs because of differences in allele frequencies and genotyping platform (this study: Affymetrix Genome-Wide Human SNP Array 6.0, CBDB/NIMH: Illumina HumanHap550K/610Quad Bead Chips). However,

there was a directionally consistent, trend association of genotype for a proxy SNP of the top SNP (rs3783332: a proxy of rs7157599,  $r^2=0.63$ , one tailed  $p=0.03$ ). No statistically significant association was observed between other two SNPs and difference score (rs1219704 and rs9586776,  $p>0.5$ ). These data indicated suggestive evidence for association between difference score in schizophrenia and rs7157599.

#### References

1. Hashimoto R, Ohi K, Yasuda Y, Fukumoto M, Yamamori H, Kamino K, Morihara T, Iwase M, Kazui H, Takeda M: The KCNH2 gene is associated with neurocognition and the risk of schizophrenia. *World J Biol Psychiatry* 2011 posted online on September 22
2. Hashimoto R, Ohi K, Yasuda Y, Fukumoto M, Yamamori H, Takahashi H, Iwase M, Okochi T, Kazui H, Saitoh O, Tatsumi M, Iwata N, Ozaki N, Kamijima K, Kunugi H, Takeda M: Variants of the RELA gene are associated with schizophrenia and their startle responses. *Neuropsychopharmacology* 2011; 36:1921-1931
3. Ohi K, Hashimoto R, Yasuda Y, Nemoto K, Ohnishi T, Fukumoto M, Yamamori H, Umeda-Yano S, Okada T, Iwase M, Kazui H, Takeda M: Impact of the genome wide supported NRG1 gene on anterior cingulate morphology in schizophrenia. *PLoS One* 2012; 7:e29780
4. Matsuoka K, Uno M, Kasai K, Koyama K, Kim Y: Estimation of premorbid IQ in individuals with Alzheimer's disease using Japanese ideographic script (Kanji) compound words:

- Japanese version of National Adult Reading Test. *Psychiatry Clin Neurosci* 2006; 60:332-339
5. Azechi M, Iwase M, Ikezawa K, Takahashi H, Canuet L, Kurimoto R, Nakahachi T, Ishii R, Fukumoto M, Ohi K, Yasuda Y, Kazui H, Hashimoto R, Takeda M: Discriminant analysis in schizophrenia and healthy subjects using prefrontal activation during frontal lobe tasks: a near-infrared spectroscopy. *Schizophr Res* 2010; 117:52-60
  6. Ikezawa K, Iwase M, Ishii R, Azechi M, Canuet L, Ohi K, Yasuda Y, Iike N, Kurimoto R, Takahashi H, Nakahachi T, Sekiyama R, Yoshida T, Kazui H, Hashimoto R, Takeda M: Impaired regional hemodynamic response in schizophrenia during multiple prefrontal activation tasks: a two-channel near-infrared spectroscopy study. *Schizophr Res* 2009; 108:93-103
  7. Ota T, Iida J, Sawada M, Suehiro Y, Kishimoto N, Tanaka S, Nagauchi K, Nakanishi Y, Yamamuro K, Negoro H, Iwasaka H, Sadamatsu M, Kishimoto T: Comparison of pervasive developmental disorder and schizophrenia by the Japanese version of the National Adult Reading Test. *Int J Psychiatry Clin Pract* 2012 Epub ahead of print
  8. Dickinson, D., Goldberg, T.E., Gold, J.M., Elvevag, B. & Weinberger, D.R. Cognitive factor structure and invariance in people with schizophrenia, their unaffected siblings, and controls. *Schizophr Bull* 2011; 37, 1157-67



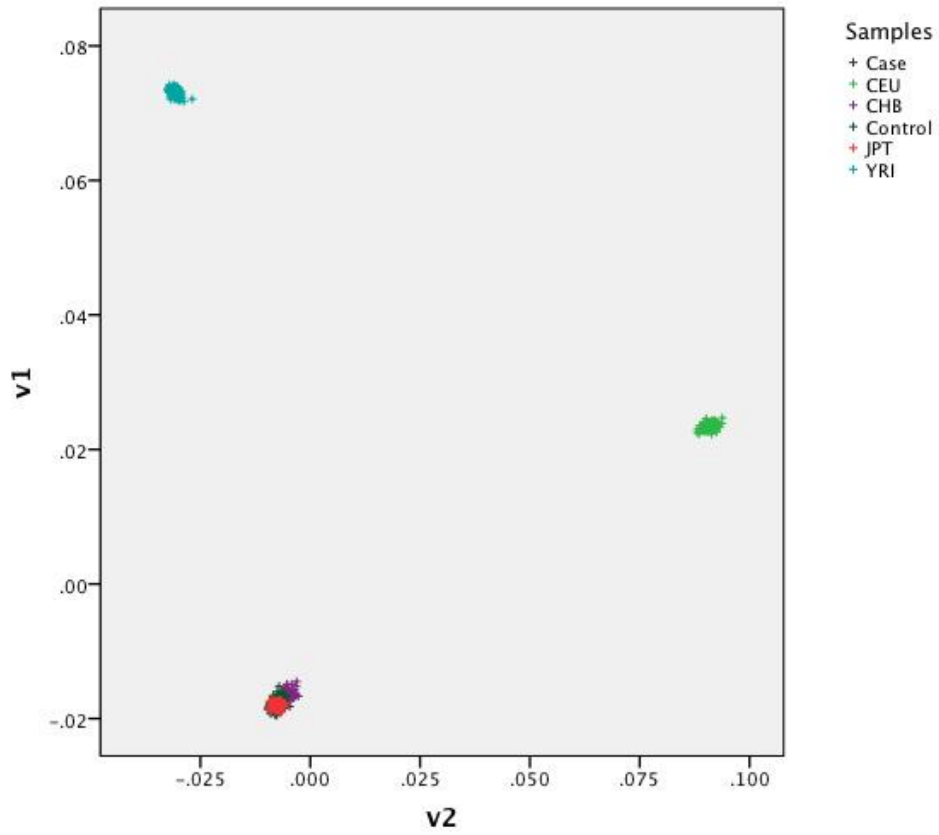

**Figure S1.** Principal component analysis: Scatter plot of eigenvectors 1 and 2.

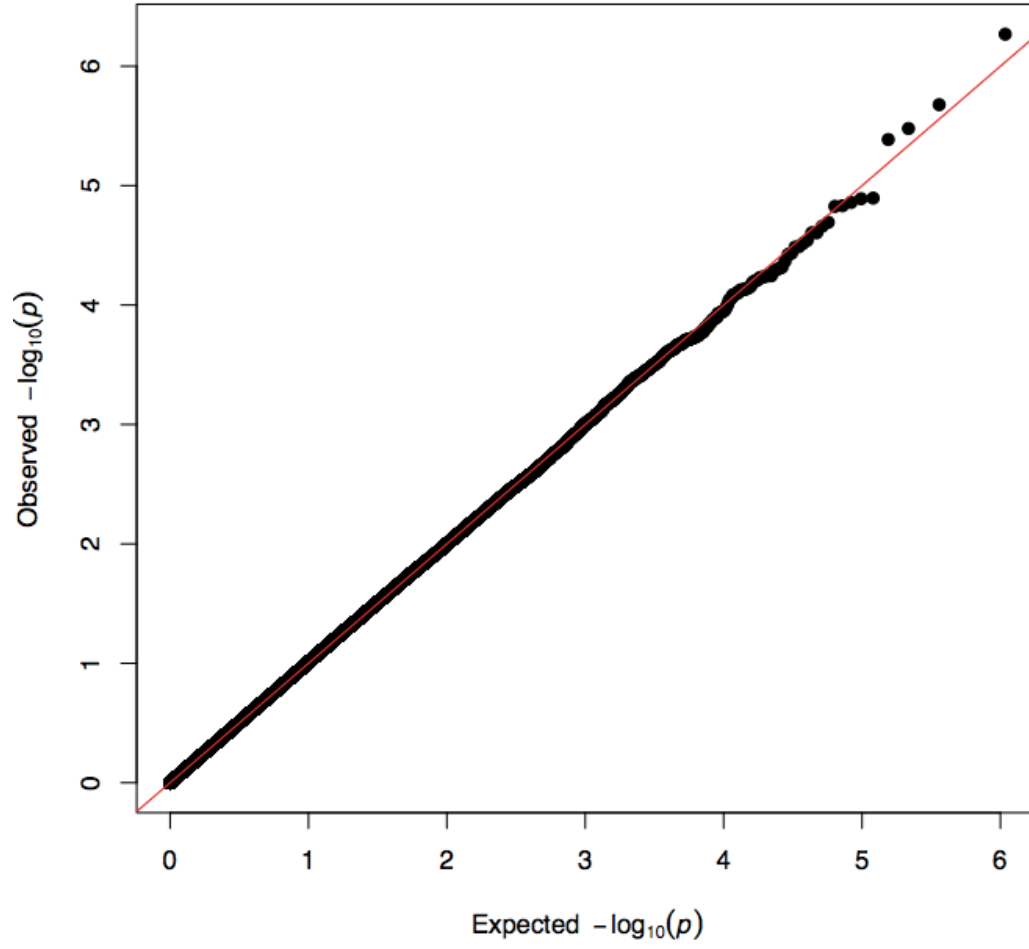

**Figure S2.** QQ plot in multiple linear regression analysis of cognitive decline in patients with schizophrenia.

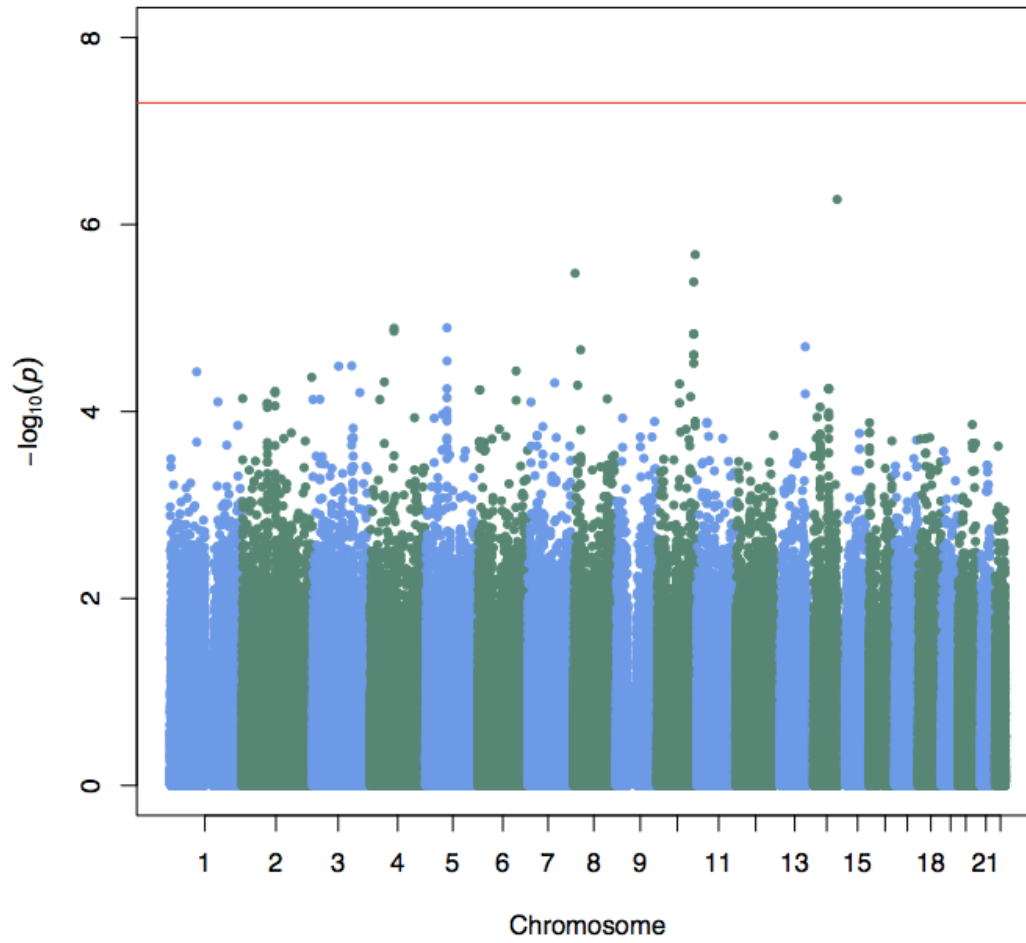

**Figure S3.** Manhattan plot in multiple linear regression analysis of cognitive decline in patients with schizophrenia. The red line indicates a P value of  $5 \times 10^{-8}$ .

**Table S1. Demographic information for subjects**

| <b>Variables</b>                     | <b>Patients with schizophrenia (n=166)</b> | <b>Comparison subjects (n=323)</b> | <b>p value</b>  |
|--------------------------------------|--------------------------------------------|------------------------------------|-----------------|
| <b>Age (years)</b>                   | <b>37.0 ± 12.1</b>                         | <b>36.2 ± 12.3</b>                 | <b>3.66E-01</b> |
| <b>Gender (male/female)</b>          | <b>(97/69)</b>                             | <b>(138/185)</b>                   | <b>9.93E-04</b> |
| <b>Education (years)</b>             | <b>13.9 ± 2.4</b>                          | <b>15.0 ± 2.3</b>                  | <b>1.01E-05</b> |
| <b>Age at onset (years)</b>          | <b>24.2 ± 9.5</b>                          |                                    |                 |
| <b>Duration of illness (years)</b>   | <b>12.7 ± 10.1</b>                         | -                                  |                 |
| <b>CPZeq. (mg/day)</b>               | <b>588.3 ± 539.0</b>                       |                                    |                 |
| <b>PANSS total</b>                   | <b>79.1 ± 21.0</b>                         | -                                  |                 |
| <b>Positive symptoms</b>             | <b>18.9 ± 5.9</b>                          | -                                  |                 |
| <b>Negative symptoms</b>             | <b>19.4 ± 6.4</b>                          | -                                  |                 |
| <b>General psychopathology scale</b> | <b>40.8 ± 10.9</b>                         |                                    |                 |
| <b>JART</b>                          | <b>101.2 ± 10.0</b>                        | <b>107.3 ± 8.1</b>                 | <b>3.65E-11</b> |
| <b>WAIS</b>                          | <b>85.1 ± 16.8</b>                         | <b>109.0 ± 12.2</b>                | <b>2.47E-41</b> |
| <b>Difference score</b>              | <b>-16.1 ± 13.1</b>                        | <b>1.7 ± 9.8</b>                   | <b>1.71E-39</b> |

CPZeq.; chlorpromazine equivalent of antipsychotics

Table S2 TOP200 SNPs for cognitive decline in schizophrenia

| SNP        | chr | bp        | tested<br>allele<br>(minor<br>allele) | MAF     |            |          | P        | GENE(+/-20KB) |
|------------|-----|-----------|---------------------------------------|---------|------------|----------|----------|---------------|
|            |     |           |                                       | cases   | comparison | subjects |          |               |
| rs7157599  | 14  | 100625902 | C                                     | 0.2805  | 0.2445     | 9.919    | 5.39E-07 | DEGS2         |
| rs1555702  | 10  | 130622498 | C                                     | 0.4024  | 0.3796     | 10.03    | 2.1E-06  |               |
| rs17069667 | 8   | 4092133   | C                                     | 0.3827  | 0.3668     | 9.425    | 3.33E-06 | CSMD1         |
| rs1219705  | 10  | 125585034 | G                                     | 0.3373  | 0.338      | -9.257   | 4.11E-06 | CPXM2         |
| rs17555780 | 5   | 73423525  | G                                     | 0.1867  | 0.2043     | -9.069   | 1.27E-05 |               |
| rs17005024 | 4   | 81945383  | G                                     | 0.09639 | 0.1173     | 11.17    | 1.29E-05 | BMP3          |
| rs11946008 | 4   | 81925707  | A                                     | 0.1159  | 0.1211     | 10.48    | 1.38E-05 |               |
| rs7900253  | 10  | 125599464 | G                                     | 0.3343  | 0.3333     | -8.721   | 1.47E-05 | CPXM2         |
| rs6599627  | 10  | 125609811 | C                                     | 0.3445  | 0.339      | -8.776   | 1.49E-05 | CPXM2         |
| rs9586776  | 13  | 105909261 | T                                     | 0.1364  | 0.1382     | -9.778   | 2.03E-05 |               |
| rs4639518  | 8   | 23256092  | G                                     | 0.311   | 0.2802     | 8.459    | 2.19E-05 | LOXL2         |
| rs2176488  | 10  | 125601148 | C                                     | 0.3384  | 0.3375     | -8.535   | 2.48E-05 | CPXM2         |
| rs7920094  | 10  | 125608590 | C                                     | 0.3478  | 0.3465     | -8.538   | 2.48E-05 | CPXM2         |
| rs290725   | 5   | 73461072  | T                                     | 0.4576  | 0.483      | -9.205   | 2.88E-05 |               |
| rs1219704  | 10  | 125585163 | G                                     | 0.3553  | 0.3462     | -8.686   | 3.05E-05 | CPXM2         |
| rs6800143  | 3   | 133844946 | A                                     | 0.441   | 0.473      | 9.424    | 3.24E-05 |               |
| rs1384771  | 3   | 88872504  | A                                     | 0.3705  | 0.3812     | 8.513    | 3.28E-05 |               |
| rs9492683  | 6   | 130967588 | G                                     | 0.4729  | 0.446      | 9.125    | 3.69E-05 |               |
| rs17501381 | 1   | 92003919  | C                                     | 0.1114  | 0.07121    | -10.11   | 3.77E-05 | CDC7          |
| rs9751676  | 2   | 238906315 | C                                     | 0.2048  | 0.2176     | 8.543    | 0.000043 | UBE2F         |
| rs13114836 | 4   | 48495577  | G                                     | 0.06098 | 0.06406    | -12.66   | 4.83E-05 | ZAR1          |
| rs3735650  | 7   | 92988398  | T                                     | 0.3098  | 0.2461     | -8.15    | 4.93E-05 | CCDC132       |
| rs11001281 | 10  | 76831010  | G                                     | 0.4299  | 0.4112     | 9.071    | 5.06E-05 | DUPD1         |
| rs1044011  | 8   | 12941709  | C                                     | 0.4789  | 0.425      | 8.83     | 5.24E-05 | DLC1          |
| rs221899   | 14  | 71605268  | G                                     | 0.3584  | 0.3858     | -8.276   | 5.69E-05 |               |
| rs2810098  | 14  | 71433911  | G                                     | 0.3584  | 0.3843     | -8.276   | 5.69E-05 | PCNX          |
| rs10045219 | 5   | 73391725  | T                                     | 0.2061  | 0.2283     | -8.47    | 5.7E-05  |               |
| rs2810073  | 14  | 71383848  | C                                     | 0.3667  | 0.3921     | -8.319   | 5.77E-05 | PCNX          |
| rs1001289  | 6   | 5910305   | T                                     | 0.04518 | 0.06019    | -14.47   | 5.87E-05 |               |
| rs10155695 | 6   | 5904791   | C                                     | 0.04518 | 0.06019    | -14.47   | 5.87E-05 |               |
| rs6736093  | 2   | 112655242 | G                                     | 0.1012  | 0.1047     | -10.28   | 6.08E-05 | MERTK         |

|            |    |           |   |        |        |        |          |              |
|------------|----|-----------|---|--------|--------|--------|----------|--------------|
| rs2175263  | 3  | 161841018 | A | 0.4604 | 0.4668 | 9.056  | 6.27E-05 |              |
| rs17779482 | 2  | 112665677 | T | 0.1054 | 0.1146 | -9.983 | 6.31E-05 | MERTK        |
| rs9558521  | 13 | 105925554 | C | 0.1386 | 0.1375 | -9.087 | 6.48E-05 |              |
| rs290481   | 10 | 114923825 | C | 0.3223 | 0.392  | -8.005 | 6.94E-05 | TCF7L2       |
| rs4704110  | 5  | 73437503  | C | 0.1898 | 0.213  | -8.323 | 7.13E-05 |              |
| rs10192365 | 2  | 1231315   | G | 0.3645 | 0.339  | 8.114  | 7.26E-05 | SNTG2        |
| rs6983475  | 8  | 115039038 | G | 0.2922 | 0.3009 | -7.951 | 7.34E-05 |              |
| rs2683540  | 3  | 24221947  | T | 0.2805 | 0.2868 | 8.066  | 7.41E-05 | THRB         |
| rs3773383  | 3  | 416943    | G | 0.4909 | 0.4657 | -9.651 | 7.44E-05 | CHL1         |
| rs10033556 | 4  | 32962030  | A | 0.4337 | 0.4658 | 8.716  | 7.46E-05 |              |
| rs1532986  | 6  | 130962874 | T | 0.4846 | 0.4585 | 8.978  | 7.58E-05 |              |
| rs12049436 | 1  | 165032101 | T | 0.4543 | 0.4969 | 8.712  | 7.89E-05 |              |
| rs4620184  | 7  | 11282387  | C | 0.3273 | 0.3204 | -8     | 7.93E-05 |              |
| rs11001286 | 10 | 76834982  | C | 0.4398 | 0.4195 | 8.901  | 8.1E-05  | DUPD1        |
| rs2164878  | 2  | 86153855  | T | 0.3645 | 0.3457 | 8.005  | 8.23E-05 |              |
| rs6547647  | 2  | 86155271  | T | 0.3645 | 0.3457 | 8.005  | 8.23E-05 |              |
| rs4848979  | 2  | 112816236 | T | 0.103  | 0.1242 | -9.945 | 0.000087 | TMEM87B      |
| rs17678541 | 14 | 41773741  | C | 0.2485 | 0.216  | -7.989 | 8.95E-05 |              |
| rs7576135  | 2  | 86160562  | T | 0.3616 | 0.35   | 8.157  | 9.07E-05 |              |
| rs2120729  | 5  | 73442438  | G | 0.488  | 0.5    | -8.951 | 9.82E-05 |              |
| rs8007026  | 14 | 71464384  | G | 0.3576 | 0.3854 | -8.102 | 0.000103 | PCNX         |
| rs6450476  | 5  | 57771087  | A | 0.1717 | 0.1543 | 8.285  | 0.000108 | LOC100289379 |
| rs2158997  | 14 | 71497794  | G | 0.3606 | 0.3793 | -7.974 | 0.000112 | PCNX         |
| rs2926721  | 5  | 73450088  | G | 0.4819 | 0.4938 | -8.777 | 0.000112 |              |
| rs2189807  | 14 | 71363031  | A | 0.375  | 0.3765 | -8.066 | 0.000114 | PCNX         |
| rs6571396  | 14 | 31681227  | T | 0.3086 | 0.3537 | -7.883 | 0.000115 | HECTD1       |
| rs17690873 | 4  | 152418466 | A | 0.1304 | 0.1242 | -9.178 | 0.000117 | FAM160A1     |
| rs1414243  | 9  | 21748433  | G | 0.3788 | 0.3172 | -7.977 | 0.000118 |              |
| rs7717683  | 5  | 29249544  | G | 0.103  | 0.1331 | -9.619 | 0.000118 |              |
| rs392079   | 5  | 73441848  | G | 0.4699 | 0.4892 | -8.548 | 0.000126 |              |
| rs11016498 | 10 | 130622295 | G | 0.2888 | 0.3006 | 7.972  | 0.000127 |              |
| rs7046961  | 9  | 131849036 | T | 0.1487 | 0.1491 | -9.16  | 0.000128 | DOLPP1       |
| rs12804535 | 11 | 35955713  | T | 0.3018 | 0.3266 | 7.828  | 0.00013  | LDLRAD3      |
| rs12926827 | 16 | 2488693   | T | 0.1536 | 0.1373 | 8.469  | 0.000132 | CCNF         |
| rs11033335 | 11 | 35957322  | T | 0.3042 | 0.3272 | 7.724  | 0.000134 | LDLRAD3      |
| rs663890   | 20 | 48405168  | G | 0.3735 | 0.3688 | -7.922 | 0.000138 |              |
| rs6687540  | 1  | 233893329 | C | 0.494  | 0.4696 | 9.367  | 0.000141 |              |
| rs942525   | 10 | 130624838 | C | 0.2866 | 0.2919 | 7.809  | 0.000142 |              |

|            |    |           |   |         |         |        |          |              |
|------------|----|-----------|---|---------|---------|--------|----------|--------------|
| rs1986783  | 7  | 52158542  | A | 0.3926  | 0.371   | 8.016  | 0.000145 |              |
| rs13101018 | 3  | 138861711 | C | 0.4848  | 0.4844  | 8.463  | 0.000151 | BPESC1       |
| rs17109189 | 14 | 71709355  | A | 0.2781  | 0.3074  | -7.951 | 0.000153 | C14orf56     |
| rs1572208  | 6  | 73171594  | C | 0.4398  | 0.4707  | -8.433 | 0.000155 |              |
| rs2784920  | 10 | 98913628  | G | 0.3163  | 0.3627  | -7.592 | 0.000155 | SLIT1        |
| rs4278162  | 8  | 23169455  | G | 0.2485  | 0.2966  | 7.688  | 0.000157 | LOXL2        |
| rs11002475 | 10 | 80031020  | C | 0.09748 | 0.08805 | 9.772  | 0.000166 | LOC100132987 |
| rs4497687  | 16 | 2446021   | G | 0.1265  | 0.1289  | 8.91   | 0.000168 |              |
| rs6600203  | 16 | 2445480   | T | 0.1265  | 0.1265  | 8.91   | 0.000168 |              |
| rs11894600 | 2  | 168784354 | A | 0.3129  | 0.3083  | 7.648  | 0.000169 |              |
| rs379468   | 15 | 70150451  | T | 0.09091 | 0.09722 | -10.48 | 0.000171 | C15orf50     |
| rs1779516  | 14 | 41753964  | G | 0.4187  | 0.4408  | -7.846 | 0.000174 |              |
| rs1431032  | 14 | 41788077  | A | 0.2438  | 0.2186  | -7.801 | 0.000176 |              |
| rs8181764  | 12 | 131062900 | C | 0.4849  | 0.4861  | 8.523  | 0.00018  |              |
| rs1622804  | 14 | 41752589  | A | 0.4099  | 0.4446  | -7.869 | 0.000181 |              |
| rs12532023 | 7  | 32394878  | C | 0.1235  | 0.1435  | 8.962  | 0.000182 |              |
| rs7791060  | 7  | 32397269  | G | 0.1235  | 0.1435  | 8.962  | 0.000182 |              |
| rs10501252 | 11 | 41258331  | T | 0.3303  | 0.3047  | 7.62   | 0.000185 |              |
| rs9354118  | 6  | 95147902  | C | 0.4121  | 0.4479  | 7.883  | 0.000185 |              |
| rs10984840 | 9  | 122868788 | G | 0.4604  | 0.4567  | 8.82   | 0.000187 |              |
| rs10735544 | 9  | 82971428  | T | 0.3705  | 0.3657  | 7.769  | 0.000187 |              |
| rs7626152  | 3  | 138675066 | C | 0.09036 | 0.1065  | 9.916  | 0.000189 | C3orf72      |
| rs12971263 | 18 | 38768209  | C | 0.4568  | 0.4026  | -8.49  | 0.00019  |              |
| rs12155122 | 7  | 98483072  | T | 0.1024  | 0.1146  | -9.75  | 0.00019  | TRRAP        |
| rs2926720  | 5  | 73450695  | G | 0.4713  | 0.4825  | -8.411 | 0.000192 |              |
| rs2093075  | 14 | 29031632  | C | 0.4581  | 0.4561  | 8.629  | 0.000193 |              |
| rs1131262  | 3  | 133941320 | C | 0.4548  | 0.4722  | 8.285  | 0.000193 | RYK          |
| rs17257677 | 11 | 90364187  | G | 0.04658 | 0.0538  | -13.38 | 0.000194 |              |
| rs6429923  | 2  | 142578483 | C | 0.2139  | 0.1904  | -7.848 | 0.000194 | LRP1B        |
| rs7228535  | 18 | 24807371  | T | 0.3606  | 0.284   | -7.749 | 0.000195 |              |
| rs17108804 | 14 | 71441524  | C | 0.3415  | 0.3416  | -7.606 | 0.000195 | PCNX         |
| rs10807383 | 6  | 47882808  | A | 0.1863  | 0.2105  | 7.997  | 0.000197 | PTCHD4       |
| rs2348394  | 3  | 138716500 | A | 0.08537 | 0.07919 | 10.2   | 0.000197 | PRR23A       |
| rs7505079  | 18 | 6666417   | G | 0.2724  | 0.2746  | 7.659  | 0.000197 |              |
| rs17122872 | 10 | 109358096 | C | 0.3282  | 0.3261  | -7.694 | 0.000199 |              |
| rs2279055  | 17 | 74309561  | G | 0.08282 | 0.07837 | 10.2   | 0.000202 | PRPSAP1      |
| rs12517914 | 5  | 73432001  | A | 0.2048  | 0.2238  | -7.699 | 0.000204 |              |
| rs821232   | 16 | 79570138  | A | 0.2229  | 0.2484  | 7.638  | 0.000207 |              |

|            |    |           |   |         |         |        |          |              |
|------------|----|-----------|---|---------|---------|--------|----------|--------------|
| rs3770535  | 2  | 216838699 | T | 0.4667  | 0.4612  | -8.259 | 0.000207 | MREG         |
| rs12213320 | 6  | 5919702   | G | 0.04848 | 0.06386 | -13.04 | 0.000208 |              |
| rs17501512 | 1  | 92012481  | C | 0.1084  | 0.07099 | -9.234 | 0.000213 |              |
| rs10155777 | 6  | 5902668   | G | 0.04819 | 0.06481 | -12.99 | 0.000213 |              |
| rs11243038 | 6  | 5897768   | C | 0.04819 | 0.06481 | -12.99 | 0.000213 |              |
| rs7744130  | 6  | 5903994   | A | 0.04819 | 0.06481 | -12.99 | 0.000213 |              |
| rs7769375  | 6  | 5904322   | G | 0.04819 | 0.06481 | -12.99 | 0.000213 |              |
| rs2679722  | 2  | 86135154  | A | 0.3515  | 0.3474  | 7.602  | 0.000215 | ST3GAL5      |
| rs9368292  | 6  | 21279204  | G | 0.4819  | 0.4645  | 8.346  | 0.000215 |              |
| rs9466024  | 6  | 21286834  | A | 0.4819  | 0.4583  | 8.346  | 0.000215 |              |
| rs4297943  | 20 | 48423756  | G | 0.3675  | 0.3627  | -7.659 | 0.000219 | SLC9A8       |
| rs6129028  | 20 | 59635795  | G | 0.2952  | 0.3179  | -7.462 | 0.000219 | LOC100506470 |
| rs1565217  | 4  | 48479718  | T | 0.06928 | 0.08514 | -11    | 0.00022  | SLC10A4      |
| rs8011741  | 14 | 41817982  | G | 0.25    | 0.2238  | -7.526 | 0.000223 |              |
| rs12140768 | 1  | 195836268 | C | 0.3913  | 0.385   | -7.999 | 0.000229 |              |
| rs9856298  | 3  | 133957265 | A | 0.4634  | 0.4777  | 8.29   | 0.00023  | RYK          |
| rs11684476 | 2  | 112793981 | C | 0.1     | 0.1265  | -9.303 | 0.000231 | MERTK        |
| rs7083193  | 10 | 112175889 | T | 0.3212  | 0.309   | 7.511  | 0.000234 |              |
| rs10950343 | 7  | 11285339  | T | 0.4187  | 0.435   | -7.783 | 0.000234 |              |
| rs13222586 | 7  | 145185358 | T | 0.1235  | 0.125   | 8.816  | 0.000234 |              |
| rs134748   | 22 | 26543287  | T | 0.3241  | 0.3738  | 7.57   | 0.000234 |              |
| rs12531858 | 7  | 32340099  | A | 0.2139  | 0.2616  | 7.651  | 0.000235 | PDE1C        |
| rs1333940  | 9  | 82971893  | A | 0.3697  | 0.3723  | 7.602  | 0.000238 |              |
| rs1684675  | 14 | 42584436  | C | 0.1327  | 0.1359  | 8.414  | 0.000241 |              |
| rs2165409  | 9  | 21748962  | A | 0.3616  | 0.3306  | -7.715 | 0.000241 |              |
| rs4703622  | 5  | 73430161  | G | 0.2089  | 0.2414  | -7.754 | 0.000242 |              |
| rs7593080  | 2  | 86145787  | T | 0.3645  | 0.3565  | 7.529  | 0.000242 |              |
| rs1136062  | 16 | 2502641   | T | 0.1402  | 0.1269  | 8.422  | 0.000245 | CCNF         |
| rs12193326 | 6  | 5898375   | G | 0.04878 | 0.06719 | -12.81 | 0.000245 |              |
| rs1546920  | 20 | 50200782  | T | 0.4548  | 0.4012  | -7.993 | 0.000247 | ATP9A        |
| rs6096487  | 20 | 50201217  | A | 0.4548  | 0.406   | -7.993 | 0.000247 | ATP9A        |
| rs10058853 | 5  | 73433080  | T | 0.1914  | 0.2242  | -7.787 | 0.000251 |              |
| rs6572138  | 14 | 42671745  | C | 0.1799  | 0.1656  | 7.834  | 0.000251 |              |
| rs2916179  | 15 | 70596974  | G | 0.2424  | 0.2654  | -7.548 | 0.000252 |              |
| rs9379687  | 6  | 24721787  | A | 0.4669  | 0.4735  | 8.195  | 0.000257 | C6orf62      |
| rs26977    | 5  | 57658416  | T | 0.09639 | 0.1056  | 9.578  | 0.000258 |              |
| rs375523   | 5  | 57686575  | A | 0.09639 | 0.1049  | 9.578  | 0.000258 |              |
| rs9295020  | 6  | 170043646 | A | 0.04839 | 0.07632 | 12.97  | 0.000261 | WDR27        |



|            |    |           |   |         |         |        |          |          |
|------------|----|-----------|---|---------|---------|--------|----------|----------|
| rs17779700 | 5  | 136572793 | G | 0.07927 | 0.1013  | 10.22  | 0.000264 | SPOCK1   |
| rs9348464  | 6  | 21282089  | G | 0.4788  | 0.4675  | 8.181  | 0.000265 |          |
| rs12460407 | 19 | 8181037   | C | 0.4127  | 0.4444  | 7.702  | 0.000266 | FBN3     |
| rs8060813  | 16 | 2499011   | T | 0.1472  | 0.134   | 8.255  | 0.000268 | CCNF     |
| rs1782156  | 14 | 41752669  | A | 0.4281  | 0.4519  | -7.835 | 0.000273 |          |
| rs2777732  | 13 | 76884327  | A | 0.4121  | 0.3994  | 7.831  | 0.000276 |          |
| rs1000448  | 14 | 71707633  | A | 0.2771  | 0.3166  | -7.461 | 0.000277 | C14orf56 |
| rs11660384 | 18 | 24801301  | T | 0.3614  | 0.284   | -7.548 | 0.00028  |          |
| rs17712675 | 18 | 24806736  | C | 0.3614  | 0.2824  | -7.548 | 0.00028  |          |
| rs10237629 | 7  | 52139899  | T | 0.3916  | 0.3727  | 7.609  | 0.000286 |          |
| rs13017143 | 2  | 86466549  | C | 0.09337 | 0.108   | 9.395  | 0.000288 | REEP1    |
| rs7736398  | 5  | 82309128  | C | 0.09091 | 0.07562 | -9.978 | 0.000292 |          |
| rs4909788  | 8  | 139424363 | C | 0.3765  | 0.3545  | 7.594  | 0.000293 | FAM135B  |
| rs2868128  | 4  | 81943068  | C | 0.1166  | 0.1672  | 8.742  | 0.000297 | BMP3     |
| rs11623006 | 14 | 22851141  | A | 0.1807  | 0.1984  | -7.841 | 0.000299 | TRA@     |
| rs17793886 | 14 | 22806220  | C | 0.1807  | 0.1975  | -7.841 | 0.000299 | TRAV41   |
| rs2574706  | 3  | 11615207  | C | 0.3343  | 0.3688  | 7.456  | 0.0003   | VGLL4    |
| rs11915859 | 3  | 138867882 | A | 0.4848  | 0.4782  | 8.096  | 0.0003   |          |
| rs10146319 | 14 | 42605529  | A | 0.1364  | 0.1378  | 8.192  | 0.000301 |          |
| rs6557672  | 8  | 23286234  | G | 0.2455  | 0.2299  | 7.433  | 0.000302 | ENTPD4   |
| rs17028885 | 3  | 32155048  | T | 0.4849  | 0.4707  | -8.273 | 0.000303 | GPD1L    |
| rs9561694  | 13 | 95453071  | C | 0.4758  | 0.4907  | -7.961 | 0.000303 |          |
| rs2285505  | 7  | 92987445  | C | 0.297   | 0.2469  | -7.304 | 0.000307 | CCDC132  |
| rs1395804  | 8  | 132510680 | T | 0.2169  | 0.1863  | 7.418  | 0.000308 |          |
| rs13178251 | 5  | 132495185 | A | 0.3182  | 0.3704  | 7.304  | 0.000313 |          |
| rs1684696  | 14 | 42547019  | A | 0.1515  | 0.1426  | 7.968  | 0.000314 |          |
| rs4286013  | 13 | 76857474  | G | 0.4146  | 0.3898  | 7.704  | 0.000316 |          |
| rs2282199  | 9  | 94909375  | A | 0.1957  | 0.205   | 7.902  | 0.000316 |          |
| rs1120577  | 17 | 64866456  | A | 0.1867  | 0.1944  | -7.762 | 0.000318 | CACNG5   |
| rs725144   | 5  | 73397114  | A | 0.1585  | 0.205   | -7.893 | 0.000319 |          |
| rs7822769  | 8  | 23304456  | C | 0.3012  | 0.2709  | 7.257  | 0.000321 | ENTPD4   |
| rs7843529  | 8  | 23289536  | G | 0.3012  | 0.2731  | 7.257  | 0.000321 | ENTPD4   |
| rs6424073  | 1  | 3285628   | G | 0.4323  | 0.4231  | -8.315 | 0.000321 | PRDM16   |
| rs16921893 | 10 | 21961864  | G | 0.2932  | 0.2848  | -7.322 | 0.000324 | MLLT10   |
| rs7815294  | 8  | 10419303  | A | 0.05723 | 0.09752 | 11.52  | 0.000326 |          |
| rs6548209  | 2  | 1228487   | G | 0.3614  | 0.3452  | 7.35   | 0.000329 | SNTG2    |
| rs6481156  | 10 | 57098859  | T | 0.378   | 0.3044  | 7.424  | 0.000329 |          |
| rs7258240  | 19 | 15772414  | G | 0.4758  | 0.483   | 7.918  | 0.000331 | CYP4F3   |

|            |    |           |   |         |         |        |          |           |
|------------|----|-----------|---|---------|---------|--------|----------|-----------|
| rs13235812 | 7  | 147556653 | A | 0.2349  | 0.2562  | 7.284  | 0.000335 | CNTNAP2   |
| rs3853291  | 11 | 44369477  | A | 0.3232  | 0.2966  | -7.135 | 0.000336 |           |
| rs6705604  | 2  | 45216585  | A | 0.2861  | 0.2747  | 7.29   | 0.000338 | SIX2      |
| rs10963750 | 9  | 18769138  | A | 0.3735  | 0.3459  | -7.345 | 0.000341 | ADAMTSL1  |
| rs689183   | 11 | 110012143 | G | 0.07831 | 0.07256 | 10.19  | 0.000341 | ZC3H12C   |
| rs10845067 | 12 | 10356973  | C | 0.1273  | 0.1475  | 8.384  | 0.000342 | GABARAPL1 |
| rs13023154 | 2  | 86516984  | A | 0.09394 | 0.1068  | 9.278  | 0.000346 | REEP1     |
| rs517543   | 18 | 75367624  | C | 0.1566  | 0.1615  | -8.11  | 0.000347 |           |
| rs2366958  | 2  | 86169989  | C | 0.1024  | 0.125   | 9.022  | 0.000347 |           |
| rs780886   | 12 | 116200160 | G | 0.1909  | 0.1807  | -7.624 | 0.000349 |           |
| rs11603377 | 11 | 21999145  | G | 0.06627 | 0.06075 | 10.98  | 0.000351 |           |
| rs7444137  | 5  | 29313927  | C | 0.1296  | 0.172   | -8.398 | 0.000352 |           |
| rs17837241 | 13 | 66613187  | A | 0.06442 | 0.075   | 11.16  | 0.000352 |           |
| rs6993786  | 8  | 23309914  | G | 0.2455  | 0.2284  | 7.347  | 0.000353 | ENTPD4    |
| rs10440955 | 7  | 11282369  | T | 0.3795  | 0.3793  | -7.438 | 0.000354 |           |
| rs11129165 | 3  | 24813614  | T | 0.3     | 0.2588  | 7.277  | 0.000359 |           |
| rs8052046  | 16 | 2484783   | A | 0.1506  | 0.1311  | 7.991  | 0.000361 | CCNF      |

MAF: minor allele frequency

Table S3: Top 10 SNPs for cognitive decline in schizophrenia with different analytical models

| rs number  | Closest gene | dominant model |          | additive model |          | 5 covariates model |          | 4 covariates model |          |
|------------|--------------|----------------|----------|----------------|----------|--------------------|----------|--------------------|----------|
|            |              | $\beta$        | p value  | $\beta$        | p value  | $\beta$            | p value  | $\beta$            | p value  |
| rs7157599  | DEGS2        | -9.92          | 5.39E-07 | -8.056         | 2.76E-06 | -9.119             | 1.11E-06 | -9.114             | 1.01E-06 |
| rs1555702  | MKI67        | -10.03         | 2.10E-06 | -6.119         | 2.70E-05 | -8.330             | 6.28E-05 | -8.307             | 6.17E-05 |
| rs17069667 | CSMD1        | -9.43          | 3.33E-06 | -4.228         | 3.56E-03 | -8.332             | 2.32E-05 | -8.333             | 2.19E-05 |
| rs1219705  | CPXM2        | 9.26           | 4.11E-06 | 4.727          | 1.28E-03 | 8.263              | 1.57E-05 | 8.250              | 1.47E-05 |
| rs17555780 | RGNEF        | 9.07           | 1.27E-05 | 8.522          | 1.31E-05 | 8.276              | 2.37E-05 | 8.278              | 2.22E-05 |
| rs17005024 | BMP3         | -11.17         | 1.29E-05 | -11.13         | 4.44E-06 | -8.711             | 5.36E-04 | -8.673             | 5.19E-04 |
| rs11946008 | BMP3         | -10.48         | 1.38E-05 | -10.52         | 4.72E-06 | -8.121             | 5.46E-04 | -8.073             | 5.44E-04 |
| rs7900253  | CPXM2        | 8.72           | 1.47E-05 | 4.131          | 4.43E-03 | 7.792              | 4.51E-05 | 7.790              | 4.23E-05 |
| rs6599627  | CPXM2        | 8.78           | 1.49E-05 | 3.946          | 5.83E-03 | 7.883              | 4.28E-05 | 7.860              | 4.14E-05 |
| rs9586776  | DAOA         | 9.78           | 2.03E-05 | 9.124          | 1.82E-05 | 8.869              | 6.24E-05 | 8.862              | 5.89E-05 |

Dominant model: Multiple linear regression analysis was performed to compare the difference score in the major allele homozygous genotypes with that in the minor allele carriers in the patients with schizophrenia. Additive model: Multiple linear regression analysis was performed to compare the difference score among subjects with major allele homozygous (0), heterozygous (1), the minor allele homozygous (2) in the patients with schizophrenia. Dominant and additive models: covariate with gender and education year; 5 covariates model: covariate with age, gender, years of education, duration of illness, and antipsychotic dose in dominant model; 4 covariates model: covariate with gender, years of education, duration of illness, and antipsychotic dose in dominant model.
